# Supplementary material
Source: PubMed Central journal article supplement (PMC5940334)
Supplement: NIHMS956685-supplement-Table_S1_.pdf [file NIHMS956685-supplement-Table_S1_.pdf]

**S. Table 1.** Non-Breast Cancer Tumor Site

|                          | <b>Subtype</b>                  | <b>N(%)</b> |
|--------------------------|---------------------------------|-------------|
| Thoracic                 |                                 | 665 (9.9)   |
|                          | Lung                            | 601 (9.0)   |
|                          | Mesothelioma                    | 34 (0.5)    |
|                          | Thymus                          | 25 (0.4)    |
|                          | Other                           | 5 (0.1)     |
| GI                       |                                 | 2939 (43.8) |
|                          | Esophagus                       | 142 (2.1)   |
|                          | Stomach                         | 127 (1.9)   |
|                          | Liver                           | 148 (2.2)   |
|                          | Gallbladder/Bile Duct           | 119 (1.8)   |
|                          | Pancreas                        | 352 (5.2)   |
|                          | Small bowel                     | 58 (0.9)    |
|                          | Colon/rectum                    | 1935 (28.8) |
|                          | Anal                            | 15 (0.2)    |
|                          | Other                           | 43 (0.6)    |
| GU                       |                                 | 1036 (15.4) |
|                          | Kidney                          | 468 (7.0)   |
|                          | Urothelial non bladder          | 18 (0.3)    |
|                          | Bladder                         | 93 (1.4)    |
|                          | Adrenal                         | 82 (1.2)    |
|                          | Prostate                        | 349 (5.2)   |
|                          | Male Germ cell                  | 17 (0.3)    |
|                          | Other                           | 9 (0.1)     |
| Bone/sarcoma             |                                 | 302 (4.5)   |
| Skin/melanoma            |                                 | 319 (4.8)   |
|                          | Melanoma                        | 290 (4.3)   |
|                          | Non-Melanoma                    | 29 (0.4)    |
| CNS                      |                                 | 45 (0.7)    |
| Head and neck            |                                 | 362 (5.4)   |
| GYN                      |                                 | 751 (11.2)  |
|                          | Cervix                          | 53 (0.8)    |
|                          | Ovary/fallopian tube/peritoneal | 558 (8.3)   |
|                          | Uterus                          | 125 (1.9)   |
|                          | Vagina/Vulva                    | 13 (0.2)    |
|                          | Female Germ Cell                | 1 (0.0)     |
| Other                    | 1 (0.0)                         |             |
| Unknown primary          |                                 | 143 (2.1)   |
| Hematological malignancy |                                 | 144 (2.1)   |
| Other                    |                                 | 5 (0.1)     |
